# Supplementary material for: Rspo1-activated signalling molecules are sufficient to induce ovarian differentiation in XY medaka (Oryzias latipes)
Source: PubMed Central journal article supplement (PMC4726049; doi:10.1038/srep19543), 2016-01-19
Supplement: srep19543-s1.pdf [file srep19543-s1.pdf]

**Rspo1-activated signalling molecules are sufficient to induce ovarian differentiation in XY medaka (*Oryzias latipes*)**

Linyan Zhou<sup>1,2,#</sup>, Tapas Chakraborty<sup>2,3,#</sup>, Qian Zhou<sup>4,#</sup>, Sipra Mohapatra<sup>3</sup>, Yoshitaka Nagahama<sup>2,3,5,\*</sup> and Yueguang Zhang<sup>1,\*</sup>

## Supplementary figures

Figure S1. **Transgene construction and assessment of transgenesis.** (A) Schematics of pIRES-hrGFP1a-Rspo1 overexpression plasmid. (B) Genotyping and integration check of *Rspo1*-overexpressed adults. Upper panel, abundant amplifications were detected in both F<sub>0</sub> and F<sub>1</sub> (XY fish) injected with pIRES-hrGFP1a-Rspo1, but no amplification was found in control XX and XY fish. Lower panel, genetic sexing of control and transgenic medaka by genomic PCR, where 2 bands (Dmy and Dmrt1) indicates genetic male, while 1 band (Dmrt1) represents female. (C) Analysis of tissue specificity of hCMV promoter driven *Rspo1* transgene in F<sub>0</sub> generation. Real-time *Rspo1* mRNA expressions were highly localized in gonads and brain, while significantly low expressions were recorded in the remaining body (RB). Data are shown as mean  $\pm$  S.E. of three independent experiments and the letters (a, b, c, etc.) above the bars indicate that these groups differ significantly from each other at  $p < 0.05$ .

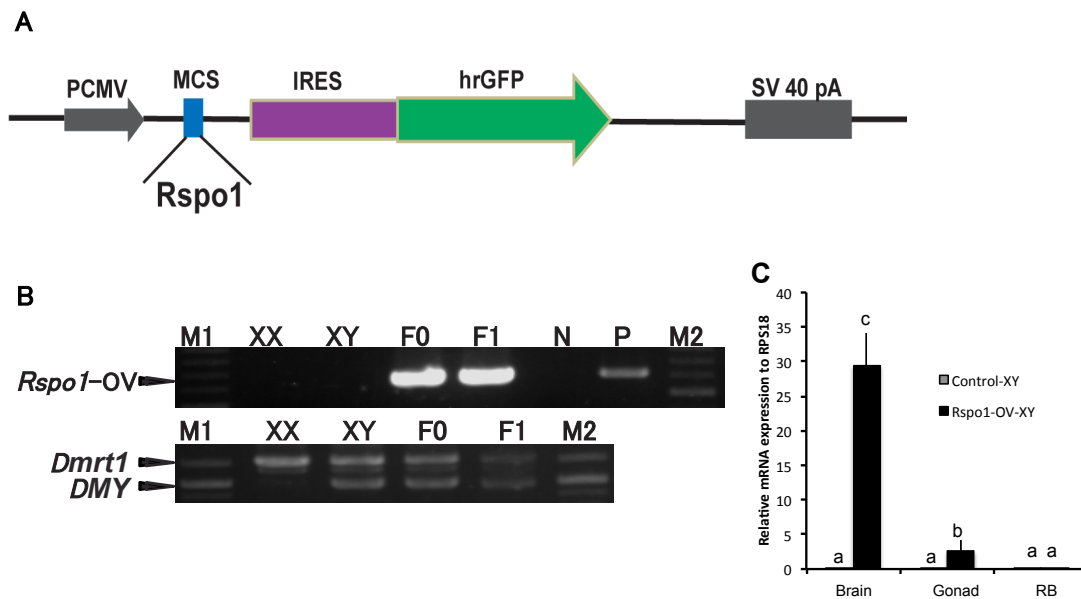

Figure S2. **Minimal promoter analysis of *Rspo1*.** *Dmy* expression plasmid were co-transfected with different sized medaka *Rspo1* (1-6 kb) promoter constructs, and relative luciferase activity (RLU) was measured after 48 hours. The RLUs of each expression plasmid (s) were plotted on Y-axis to prepare the graph. Data are shown as mean  $\pm$  S.E. of three independent experiments and the letters (a, b, c, etc.) above the bars indicate that these groups differ significantly from each other at  $p < 0.01$ . Note: the length of different promoter constructs were determined empirically using the availability of potential *DM* domain binding sites.

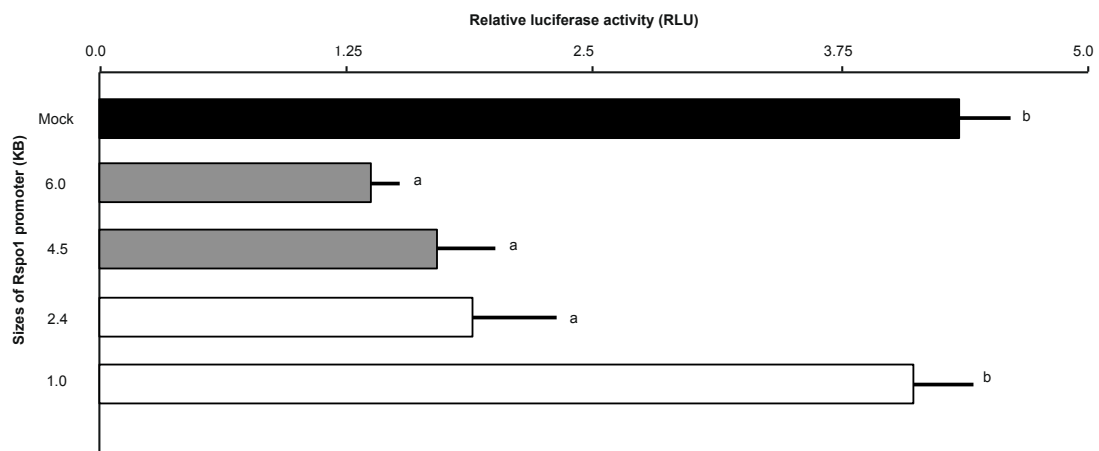

## Supplementary table

**SI Table 1: Screening of *Rspo1*-OV-XY F<sub>0</sub> progenies.**

| Genotype  | Phenotype |           | Fertility      |                 |                 |
|-----------|-----------|-----------|----------------|-----------------|-----------------|
|           | XY        | female    | male           | spawning        | non-spawning    |
| <b>38</b> | <b>21</b> | <b>17</b> | <b>9 (24%)</b> | <b>12 (32%)</b> | <b>17 (44%)</b> |

**SI Table 2: List of major primers used in this study.**

| Primer name              | Primer sequence (5' to 3')                       | Purpose                               |
|--------------------------|--------------------------------------------------|---------------------------------------|
| <i>Rspo1</i> -GFP-F      | GAGCTCCCGCGGATGCAGCTGGGACTGGTG                   | Amplification of <i>Rspo1</i>         |
| <i>Rspo1</i> -GFP-R      | GGATCCGAATTCGGTGACGGAGCTGGTTGTG                  |                                       |
| <i>Rspo1</i> -gPCR-F     | ACATGTGGGTTTAAGAAAGGC                            | Genomic PCR of <i>Rspo1</i> transgene |
| <i>Rspo1</i> -gPCR-R     | GTCCTTATCATCGTCGTCTT                             |                                       |
| <i>DMY</i> -gPCR-F       | CCG GGTGCCCAAGTGCTCCCGCTG                        | Genomic PCR of <i>DMY</i>             |
| <i>DMY</i> -gPCR-R       | GATCGTCCCTCCACAGAGAAGAGA                         |                                       |
| <i>β-catenin</i> -qPCR-F | ACTGGATATCGGAGCACAGG                             | Real-time PCR                         |
| <i>β-catenin</i> -qPCR-R | CAGGGAGAGCATCAGTGTGA                             |                                       |
| <i>Dmrt1</i> -qPCR-F     | TCCTCCTACTATGGAAACCTGTACCA                       | Real-time PCR                         |
| <i>Dmrt1</i> -qPCR-R     | GAAGGAGTGCATGCGGTACTG                            |                                       |
| <i>Cyp19a1a</i> -qPCR-F  | AGCTTATTTTTGCCCAAGGCC                            | Real-time PCR                         |
| <i>Cyp19a1a</i> -qPCR-R  | TTGAGCAGCAGGAGCATGAAA                            |                                       |
| <i>Gsdf</i> -qPCR-F      | GGGCTGGACACTATTCGAGA                             | Real-time PCR                         |
| <i>Gsdf</i> -qPCR-R      | CATGACACAGAGGAGCTGGA                             |                                       |
| <i>Dmy</i> -qPCR-F       | TCCTATTATGGAAACCTGCACAACCTAC                     | Real-time PCR                         |
| <i>Dmy</i> -qPCR-R       | GAAGGAGTGCATGCGGTACG                             |                                       |
| <i>Sox9</i> -qPCR-F      | CTCCGACGCTCCCAGTCCCA                             | Real-time PCR                         |
| <i>Sox9</i> -qPCR-R      | GACGGCCGGGTGTTTTCGGT                             |                                       |
| <i>Wnt4b</i> -qPCR-F     | CTGGAAAGTCATGCCTCCAT                             | Real-time PCR                         |
| <i>Wnt4b</i> -qPCR-R     | TACGCGTTAAGCGAACCTCT                             |                                       |
| <i>EF1 α</i> -F14        | CAGCTTCAACGCTCAGGTCAT                            | Real-time PCR                         |
| <i>EF1 α</i> -R14        | TGAACTTGCAGGCGATGTGA                             |                                       |
| <i>Rspo1</i> -pro-F      | GGGTACCACGCGTGCCTGCCCTTATGGAGCAG                 | Amplification of promoter region      |
| <i>Rspo1</i> -pro-R      | TAATACTACC<br>GAGATCTCTCGAGGATGATCCCGCTTTTCTCCTG |                                       |
